# Supplementary material for: N-Boronated polybenzimidazole for composite electrolyte design of highly ion conducting pseudo solid-state ion gel electrolytes with a high Li-transference number
Source: Royal Society of Chemistry journal article supplement (doi:10.1039/c8ta10476j), 2018-12-21
Supplement: c8ta10476j1.pdf [file c8ta10476j1.pdf]

## **N-boronated polybenzimidazole for composite electrolyte design of single ion conductivity**

Aniruddha Nag<sup>a</sup>, Mohammad Asif Ali<sup>a</sup>, Ankit Singh<sup>a</sup>, Raman Vedarajan<sup>a, b</sup>, Noriyoshi Matsumi<sup>a\*</sup>,  
Tatsuo Kaneko<sup>a\*</sup>

<sup>a</sup>Graduate School of Advanced Science and Technology, Energy and Environment Area  
Japan Advanced Institute of Science and Technology, 1-1 Asahidai, Nomi, Ishikawa, 923-1292  
Japan

<sup>b</sup>Centre for Fuel Cell Technology, International Advanced, Research Centre for Powder  
Metallurgy, Phase I - 2nd Floor, IITM Research Park, Taramani, Chennai 600113, India

E-mail: [kaneko@jaist.ac.jp](mailto:kaneko@jaist.ac.jp), [matsumi@jaist.ac.jp](mailto:matsumi@jaist.ac.jp)

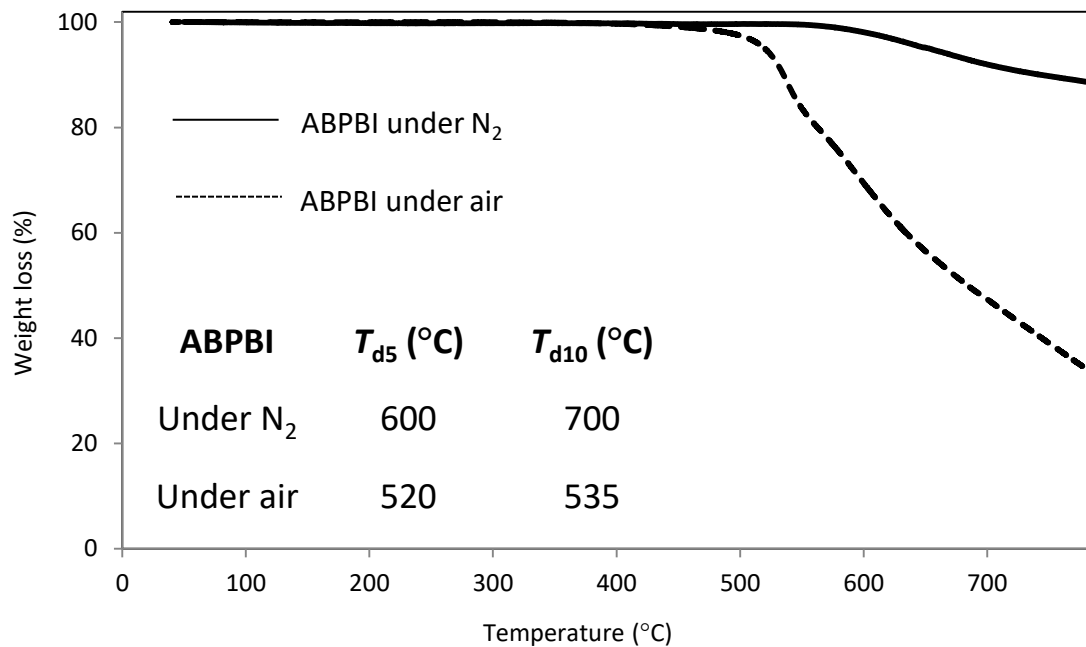

Fig. S1 TGA plots of poly(2, 5-benzimidazole) under different atmosphere

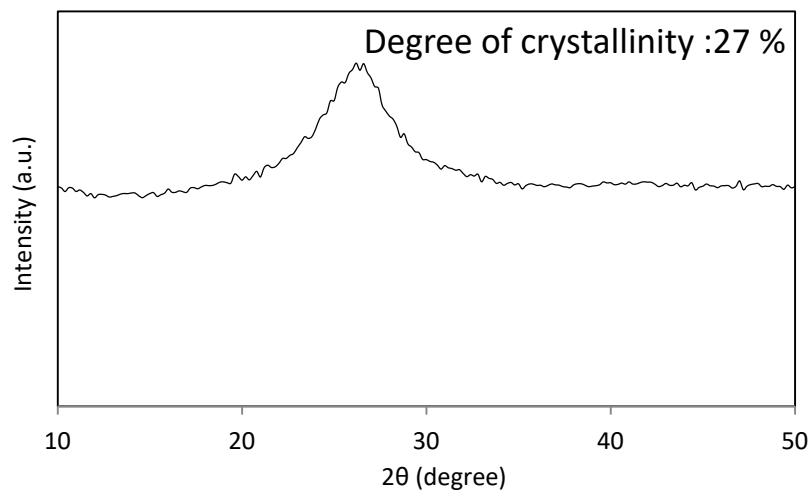

Fig. S2 Wide angle x-ray diffraction (WAXD) diagrams of poly(2, 5-benzimidazole)

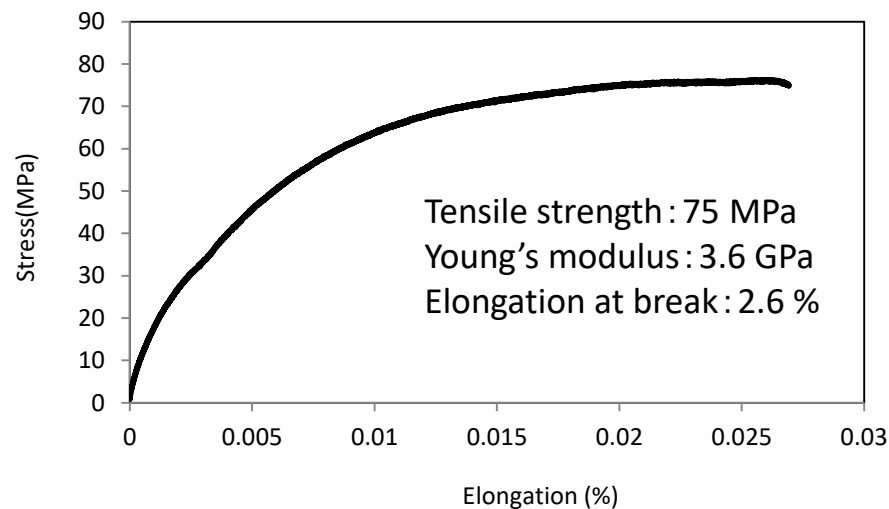

Fig. S3 Stress-strain curves of poly(2, 5-benzimidazole)

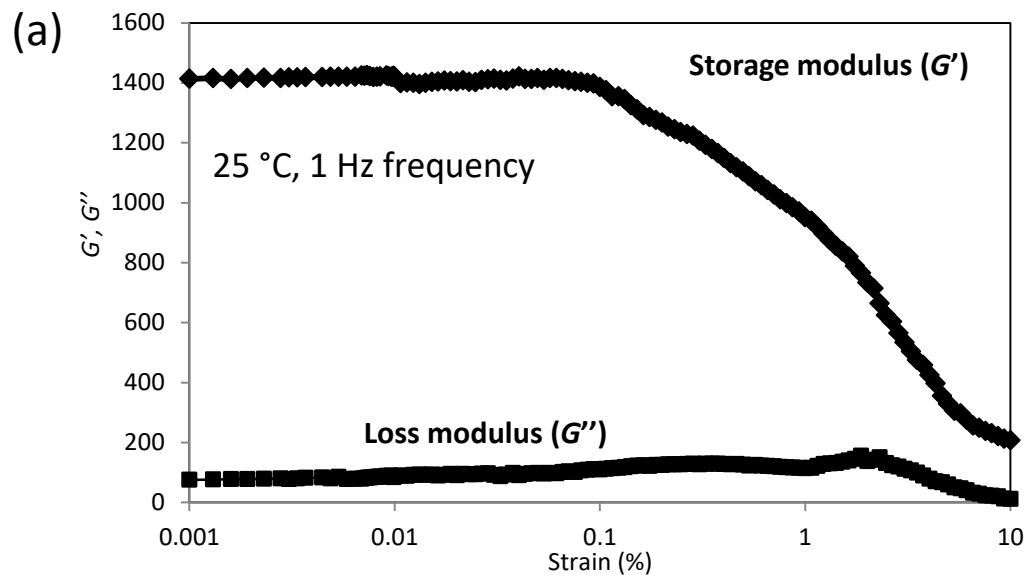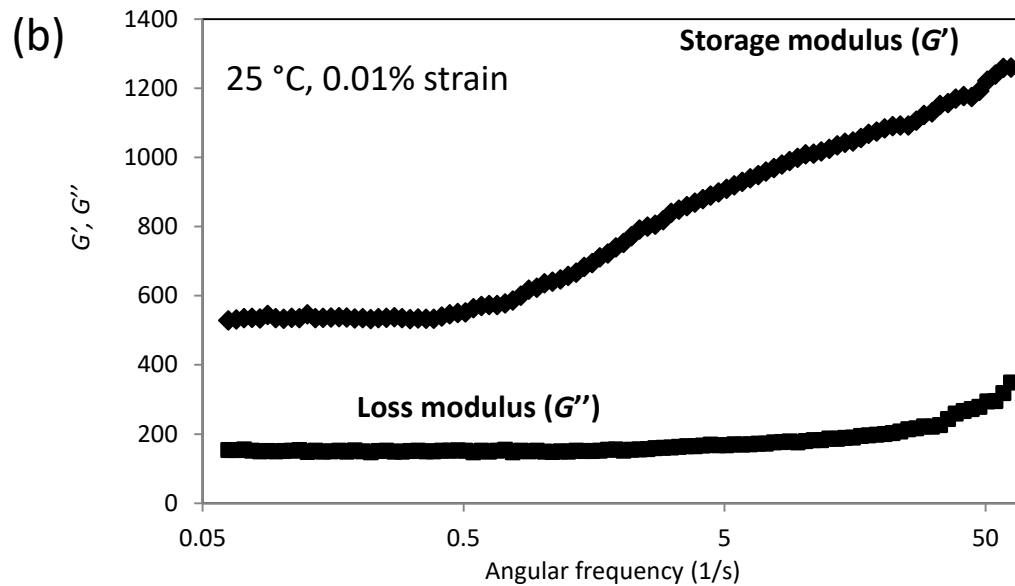

Fig. S4 Storage moduli,  $G'$  and loss moduli,  $G''$  of the polymer electrolyte (25/75) measured with varying (a) shear strain, (b) shear frequency

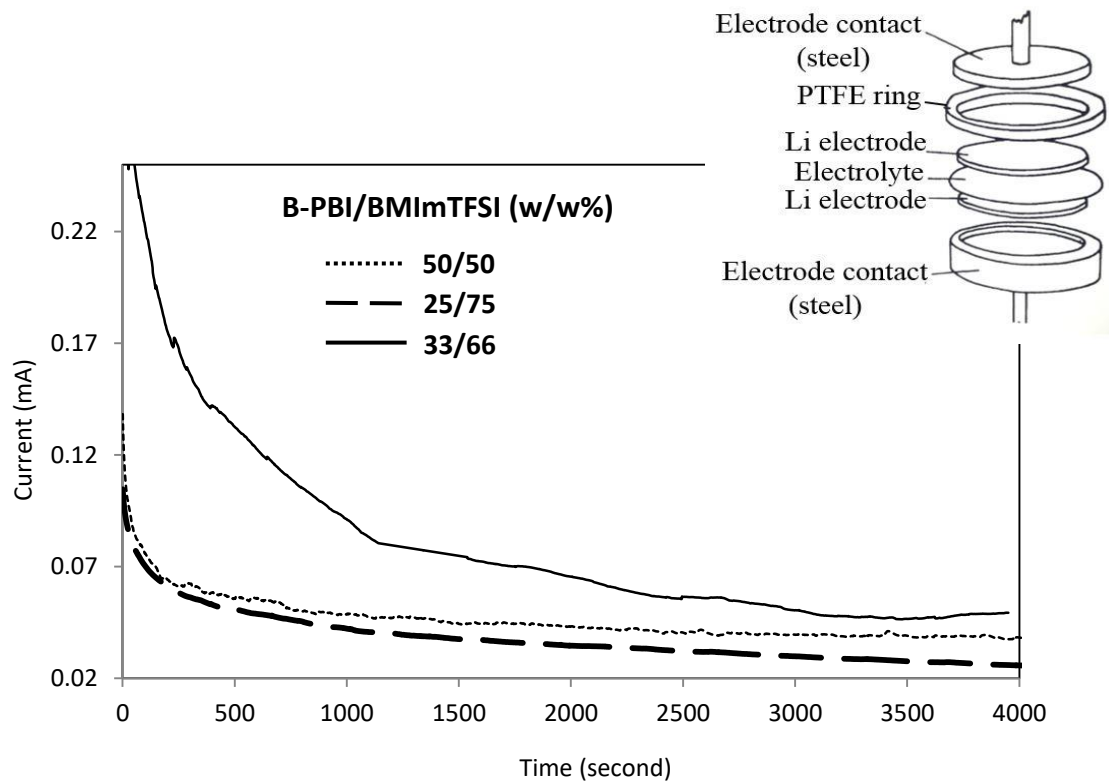

Fig.S5 DC Polarization profiles of various composites of boronated polybenzimidazole with BMIImTFSi  
 Inset: Cell set-up for DC polarization

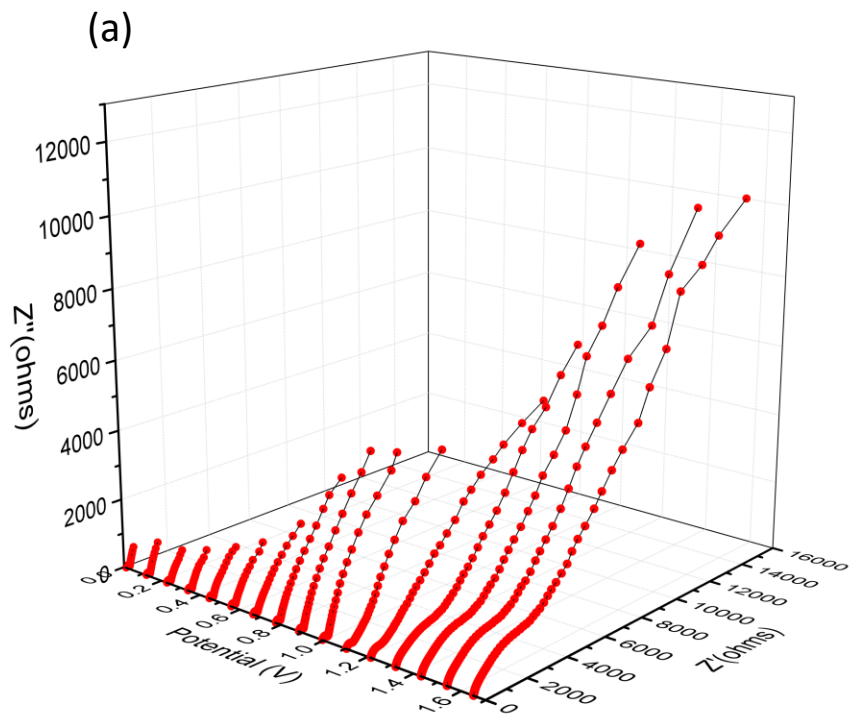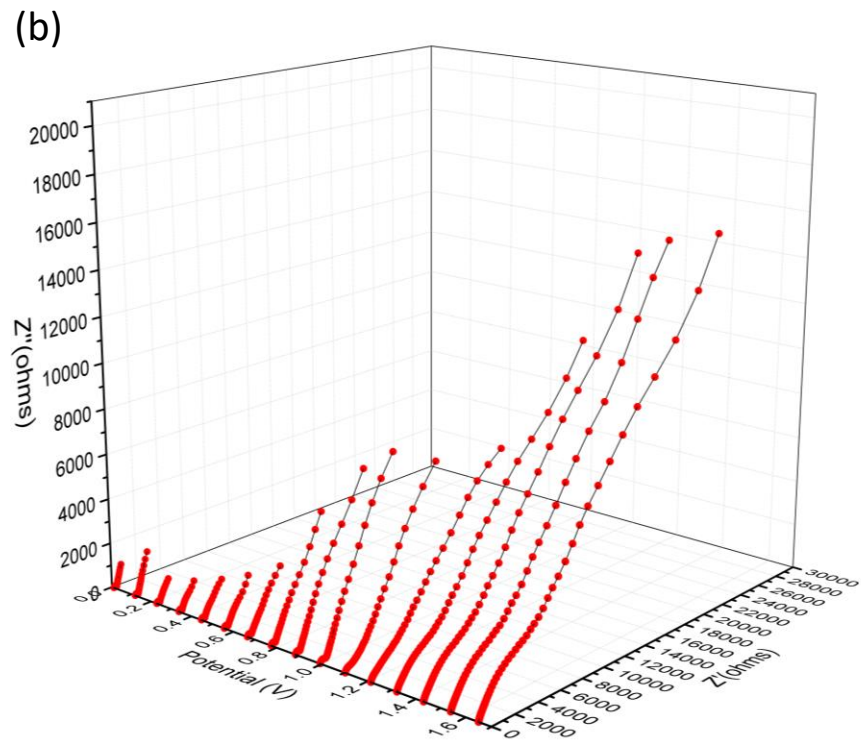

Fig. S6 DEIS profile during discharging of an anodic half-cell using polymer electrolyte (25/75), (a) freshly prepared cell, (b) after 10 cycles at charging rate of 0.5 C
